# Supplementary material for: Marine Seaweed Polysaccharides-Based Engineered Cues for the Modern Biomedical Sector
Source: Mar Drugs. 2019 Dec 19;18(1):7. doi: 10.3390/md18010007 (PMC7024278; doi:10.3390/md18010007)
Supplement: Supplementary file 1 [file marinedrugs-18-00007-s001.pdf]

## Supplementary Data:

**Table S1.** Literature search results obtained from the Scopus database. The distribution of articles in each search category is based on total number of articles and reads from top to bottom column wise.

| Search Terms                             | Document Types                                                | # of Articles from All Years |      | # of Articles from Top Journals                           |      | # of Articles Based on Territory |      |
|------------------------------------------|---------------------------------------------------------------|------------------------------|------|-----------------------------------------------------------|------|----------------------------------|------|
| Marine seaweed polysaccharides           | Article, Review, Book Chapter, Conference Paper, Book         | 2019                         | 43   | <i>Marine Drugs</i>                                       | 41   | India                            | 62   |
|                                          |                                                               | 2018                         | 46   | <i>Journal of Applied Phycology</i>                       | 15   | South Korea                      | 59   |
|                                          |                                                               | 2017                         | 47   | <i>Carbohydrate Polymers</i>                              | 12   | China                            | 48   |
|                                          |                                                               | 2016                         | 55   | <i>International Journal of Biological Macromolecules</i> | 12   | Brazil                           | 40   |
|                                          |                                                               | 2015                         | 45   | <i>Advances in Food and Nutrition Research</i>            | 11   | France                           | 34   |
|                                          |                                                               | All past years               | 233  | All other Journals                                        | 378  | Other countries                  | 226  |
| Drug delivery using polysaccharides      | Article, Review, Book Chapter, Conference Paper               | 2020                         | 9    | <i>Carbohydrate Polymers</i>                              | 235  | United States                    | 874  |
|                                          |                                                               | 2019                         | 441  | <i>International Journal of Biological Macromolecules</i> | 202  | India                            | 873  |
|                                          |                                                               | 2018                         | 470  | <i>Journal of Controlled Release</i>                      | 171  | China                            | 849  |
|                                          |                                                               | 2017                         | 455  | <i>International Journal of Pharmaceutics</i>             | 157  | Italy                            | 311  |
|                                          |                                                               | 2016                         | 409  | <i>Biomaterials</i>                                       | 129  | United Kingdom                   | 289  |
|                                          |                                                               | All past years               | 3433 | All other Journals                                        | 4323 | Other countries                  | 2021 |
| Wound healing using polysaccharides      | Article, Review, Conference Paper, Book Chapter, Short Survey | 2020                         | 2    | <i>International Journal of Biological Macromolecules</i> | 60   | United States                    | 214  |
|                                          |                                                               | 2019                         | 140  | <i>Carbohydrate Polymers</i>                              | 57   | China                            | 203  |
|                                          |                                                               | 2018                         | 130  | <i>Biomaterials</i>                                       | 30   | India                            | 137  |
|                                          |                                                               | 2017                         | 117  | <i>Biomacromolecules</i>                                  | 20   | United Kingdom                   | 80   |
|                                          |                                                               | 2016                         | 89   | <i>Journal of Ethnopharmacology</i>                       | 16   | Italy                            | 66   |
|                                          |                                                               | All past years               | 737  | All other Journals                                        | 1032 | Other countries                  | 515  |
| Anticancer activities of polysaccharides | Article, Review, Book Chapter, Conference Paper, Short Survey | 2020                         | 4    | <i>Carbohydrate Polymers</i>                              | 71   | China                            | 333  |
|                                          |                                                               | 2019                         | 113  | <i>International Journal of Biological Macromolecules</i> | 71   | India                            | 127  |
|                                          |                                                               | 2018                         | 126  | <i>Marine Drugs</i>                                       | 22   | South Korea                      | 123  |
|                                          |                                                               | 2017                         | 109  | <i>International Journal of Medicinal Mushrooms</i>       | 15   | United States                    | 99   |
|                                          |                                                               | 2016                         | 94   | <i>Molecules</i>                                          | 13   | Japan                            | 43   |

|                                                    |                                  | All past years | 551 | All other Journals                           | 805 | Other countries | 272 |
|----------------------------------------------------|----------------------------------|----------------|-----|----------------------------------------------|-----|-----------------|-----|
| Polysaccharide<br>-based<br>engineered<br>carriers | Article, Review,<br>Book Chapter | 2019           | 3   | <i>ACS Applied Materials and Interfaces</i>  | 1   | France          | 5   |
|                                                    |                                  | 2018           | 3   | <i>Accounts of Chemical Research</i>         | 1   | United States   | 3   |
|                                                    |                                  | 2017           | 3   | <i>American Journal of Cancer Research</i>   | 1   | Australia       | 2   |
|                                                    |                                  | 2016           | 3   | <i>Carbohydrate Polymers</i>                 | 1   | China           | 2   |
|                                                    |                                  | 2015           | 2   | <i>Colloids and Surfaces B Biointerfaces</i> | 1   | Italy           | 2   |
|                                                    |                                  | All past years | 5   | All other Journals                           | 14  | Other countries | 5   |
